# Supplementary material for: A porous β-cyclodextrin-based terpolymer fluorescence sensor for in situ trinitrophenol detection
Source: Royal Society of Chemistry journal article supplement (doi:10.1039/c8ra06192k), 2019-01-01
Supplement: c8ra06192k1.pdf [file c8ra06192k1.pdf]

## Supporting Information

### A porous $\beta$ -Cyclodextrin-based terpolymer fluorescence sensor for *in situ* trinitrophenol detection

Michael K. Danquah,<sup>a</sup> Shan Wang,<sup>b</sup> Qianyou Wang,<sup>b</sup> Bo Wang,<sup>b</sup> and Lee D. Wilson<sup>a\*</sup>

<sup>a</sup>Department of Chemistry, University of Saskatchewan, 110 Science Place, Saskatoon, Saskatchewan S7N 5C9, Canada.

<sup>b</sup>Beijing Key Laboratory of Photoelectronic/Electrophotonic Conversion Material, Key Laboratory of Cluster Science, Ministry of Education, School of Chemistry and Chemical Engineering, Beijing Institute of Technology, 5 South Zhongguancun Street, Beijing 100081, P. R. China

\* Corresponding author. Email: lee.wilson@usask.ca (L. D. Wilson), Tel. +1-306-966-2961, Fax. +1-306-966-4730

#### Contents

Number of pages: 5

Number of Figures: 3

#### List of Figures:

**Figure S1.** <sup>13</sup>C NMR CP-MAS spectra of the PFP and FL-PFP polymer materials. Obtained at a spectrometer frequency of 125 MHz and 8 kHz MAS frequency.

**Figure S2.** N<sub>2</sub> adsorption-desorption isotherm for PFP at 77 K (CD: linker; 1:10).

**Figure S3.** CO<sub>2</sub> adsorption-desorption isotherm for PFP at 273 K (CD: linker; 1:10).

#### Experimental Section:

##### S1. Synthesis of porous framework polymers (PFP)

$\beta$ -CD (0.185 g, 0.162 mmol) was purged with N<sub>2</sub> for 5 mins and 5-mL DMA was added. The mixture was equilibrated at -20°C for 30 minutes. DL (0.435 g, 1.645 mmol) pre-dissolved in 5-mL DMA was added dropwise to the reaction mixture over a period of 20 mins with continuous

stirring for 48 h using magnetic stirring. A creamy brown coloured suspension resulted that was washed with distilled water (3×10-mL). Subsequent washing with DMF (3× 10-mL), acetone (3× 10-mL) and finally with distilled water (3×10-mL) to afford light brown solids which were freeze dried for 24 h. The polymers were ground with a mortar and pestle and passed through a size 30 mesh sieve and stored in a desiccator for further use. Figure 2.2 depicts an illustration of the cross-linking reaction for polymer materials containing  $\beta$ -CD and 4, 4'-diisocyanato-3,3'-dimethyl biphenyl (DL), referred to as a porous framework polymer (PFP).

## **S2. Solid state $^{13}\text{C}$ NMR spectroscopy**

Solid-state  $^{13}\text{C}$  NMR spectra were obtained with a wide-bore (89 mm) 8.6 T Oxford superconducting magnet system equipped with a 4 mm CP-MAS (cross-polarization with magic angle spinning) solids probe. An Avance DRX360 console and workstation running Top Spin 1.3 (Bruker Bio Spin Corp.; Billerica, MA) was used to control the acquisition parameters using standard pulse programs. The samples were packed in 4-mm-outer-diameter zirconium oxide rotors capped with Teflon MAS rotor caps. Acquisition was carried out with MAS at 8 kHz along with a 2 s recycle delay and 750  $\mu\text{s}$  cross polarization.

## **Results and Discussion:**

### **S3. Solid-State $^{13}\text{C}$ NMR spectra for PFP and FL-PFP**

Solid state  $^{13}\text{C}$  NMR spectra give additional structural information to complement the FT-IR results. The broad spectral lines are related to the amorphous nature of the polymers (PFP and FL-PFP) due to the level of cross-linking and the nature in which the reaction occurs within a polymer material as compared with native  $\beta$ -CD. The spectral signatures of  $\beta$ -CD at  $\delta=75$  and  $\delta=100$  ppm;

whereas the signature at 157 ppm corresponds to the newly formed alkoxy bonds shown in Figure 3.11. The signatures at  $\delta = 120-140$  ppm relates to the aromatic carbons of both the TPE and the diisocyanate linker.

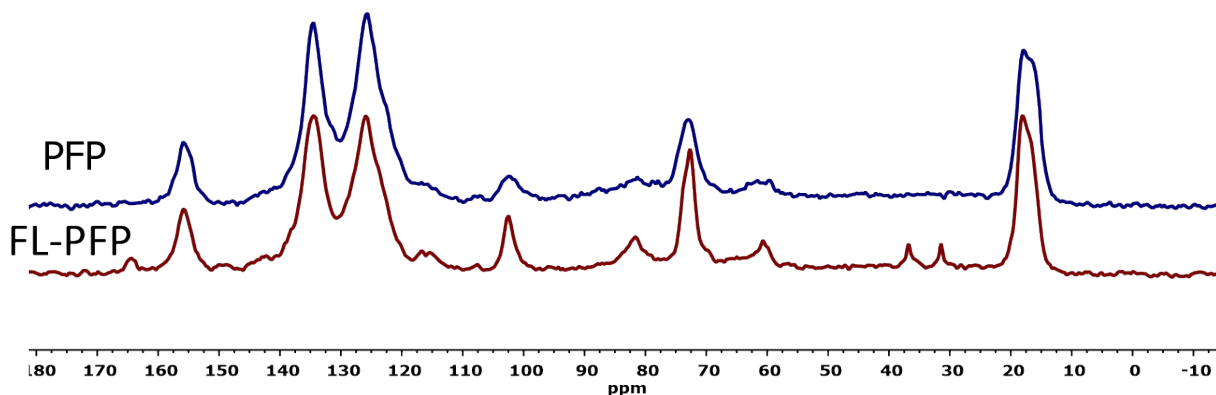

**Figure S1.**  $^{13}\text{C}$  NMR CP-MAS spectra of the PFP and FL-PFP polymer materials. Obtained at a spectrometer frequency of 125 MHz and 8 kHz MAS frequency.

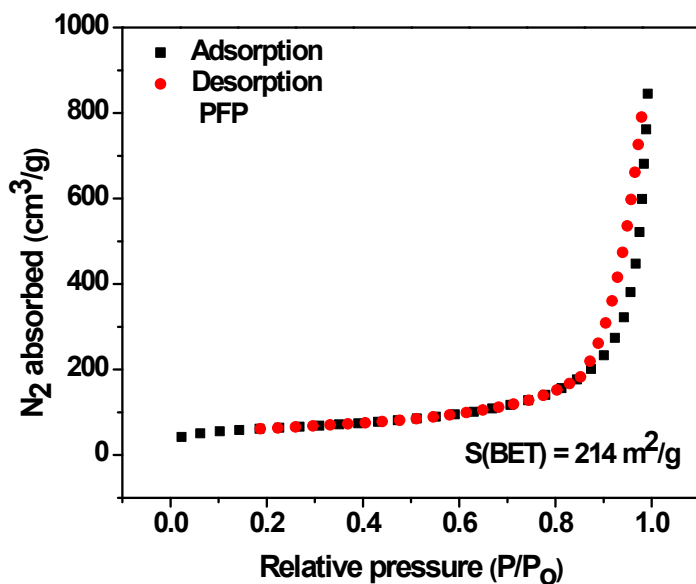

**Figure S2.**  $\text{N}_2$  adsorption-desorption isotherm for PFP at 77 K (CD: linker; 1:10).

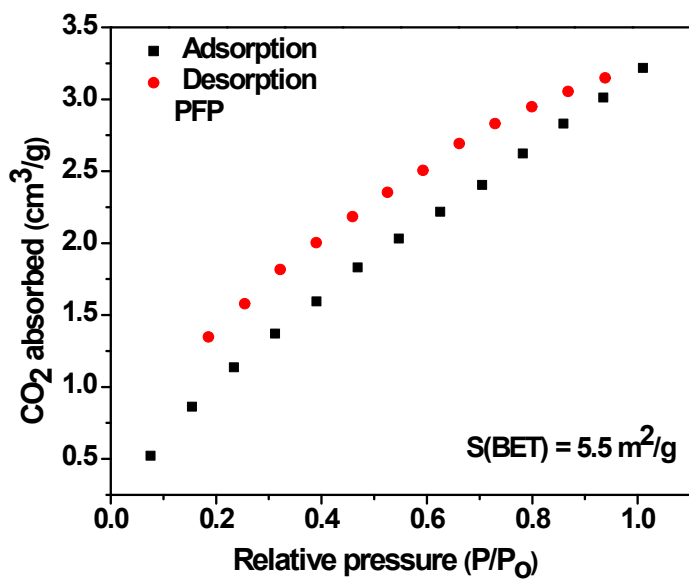

**Figure S3.** CO<sub>2</sub> adsorption-desorption isotherm for PFP at 273 K (CD: linker; 1:10).
